# Supplementary material
Source: MDPI journal article supplement (https://www.mdpi.com/2071-1050/15/18/14028)
Supplement: s1 [file s1]

# **Supplementary Material**

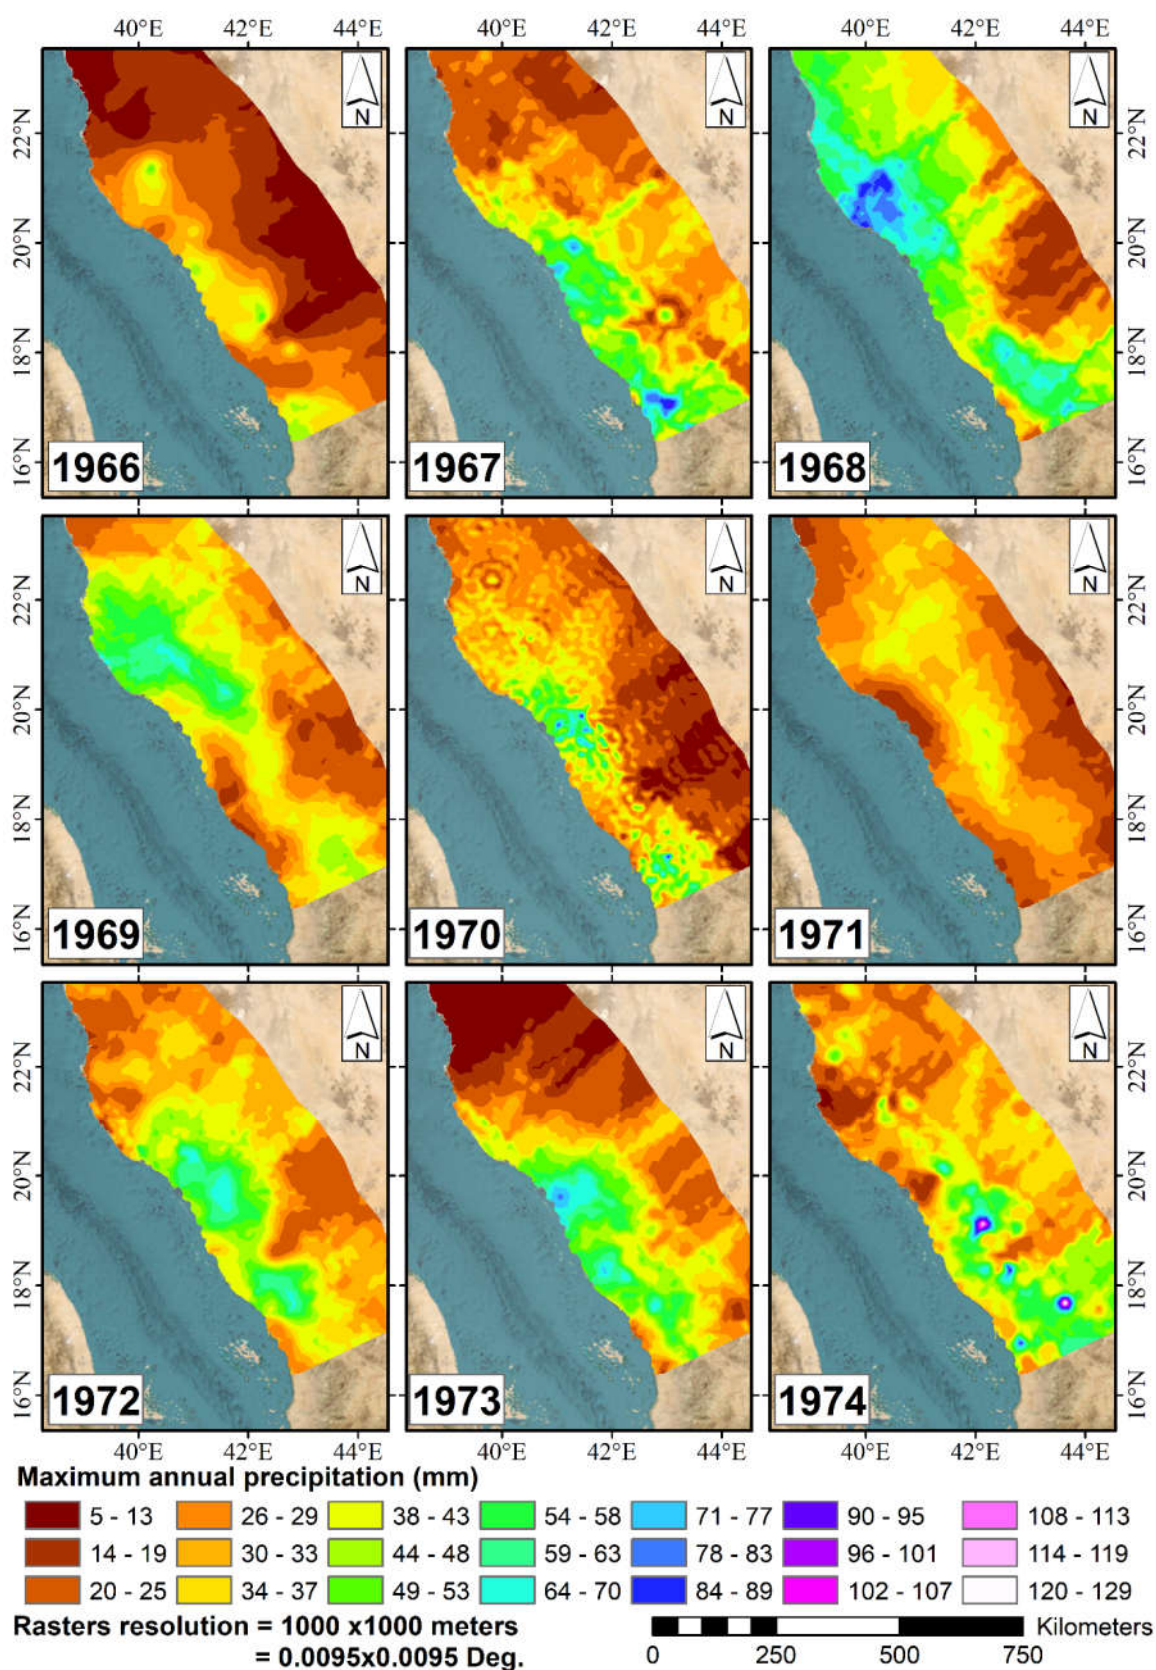

**Figure S1: Distribution of maximum annual rainfall from 1966 to 1974.**

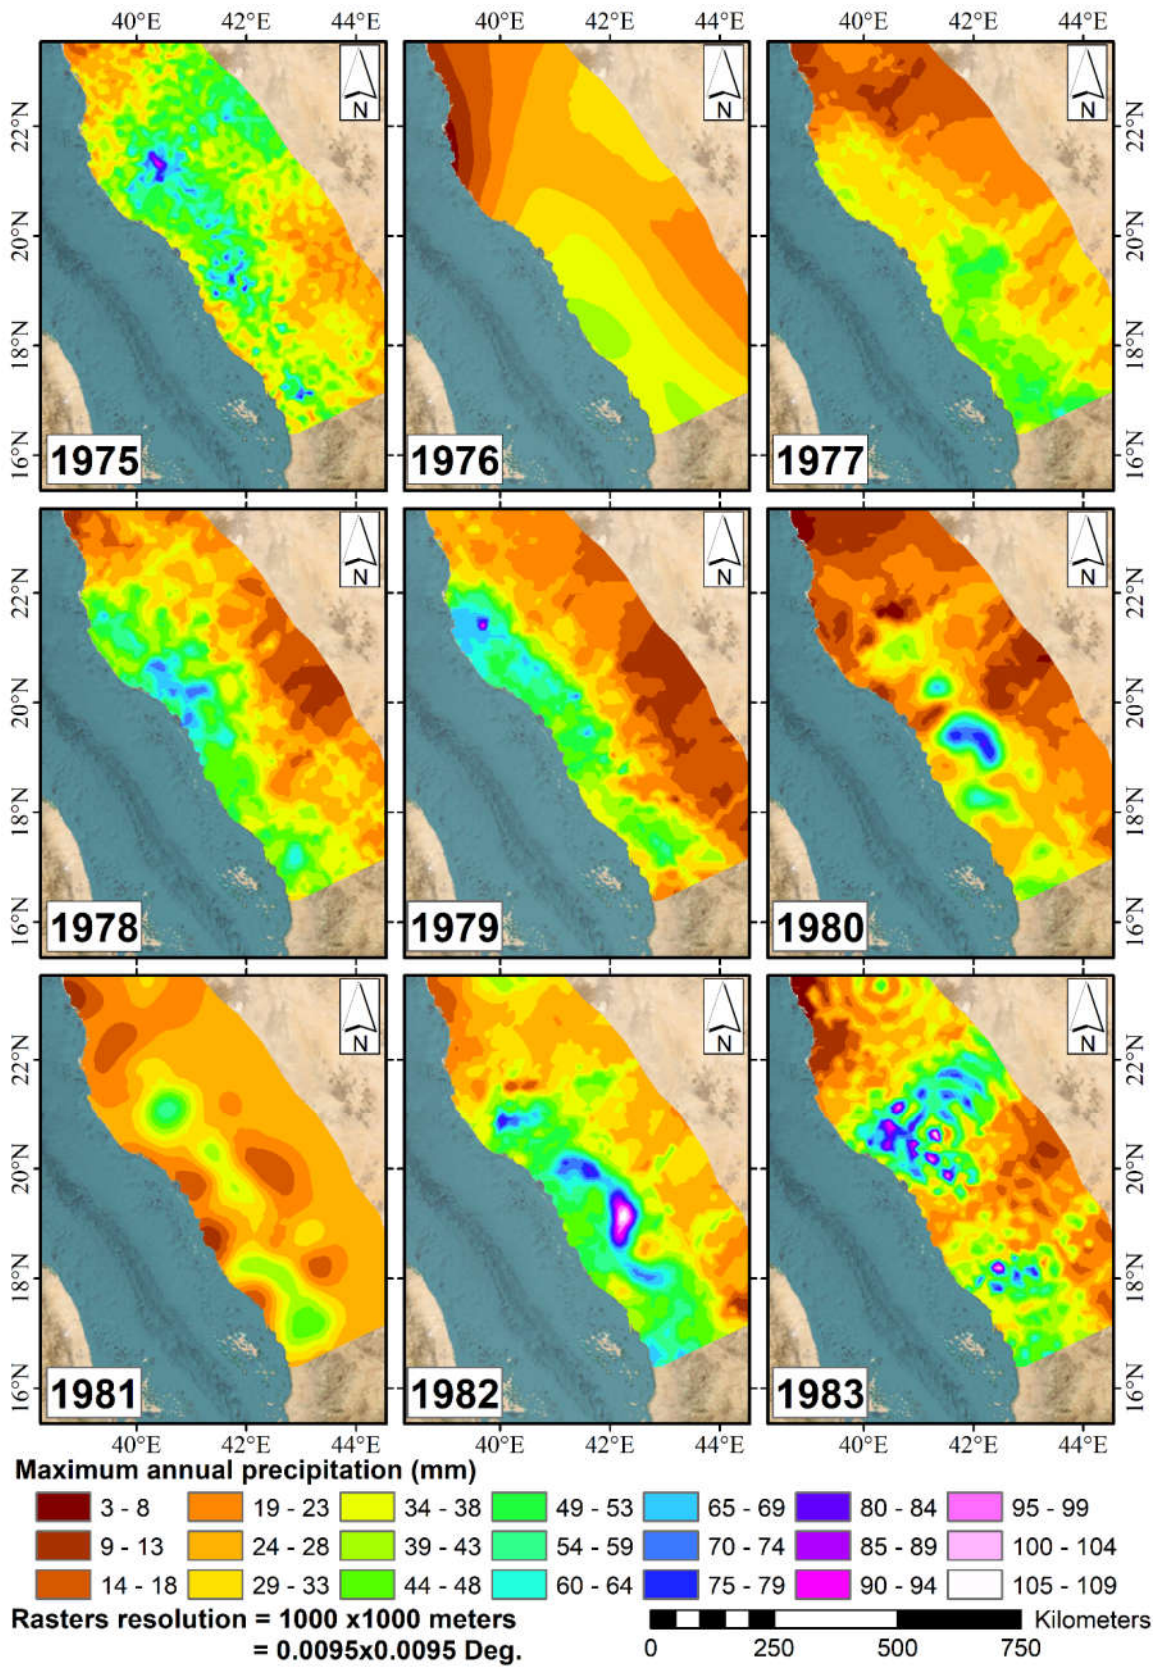

**Figure S2:** Distribution of maximum annual rainfall from 1965 to 1983.



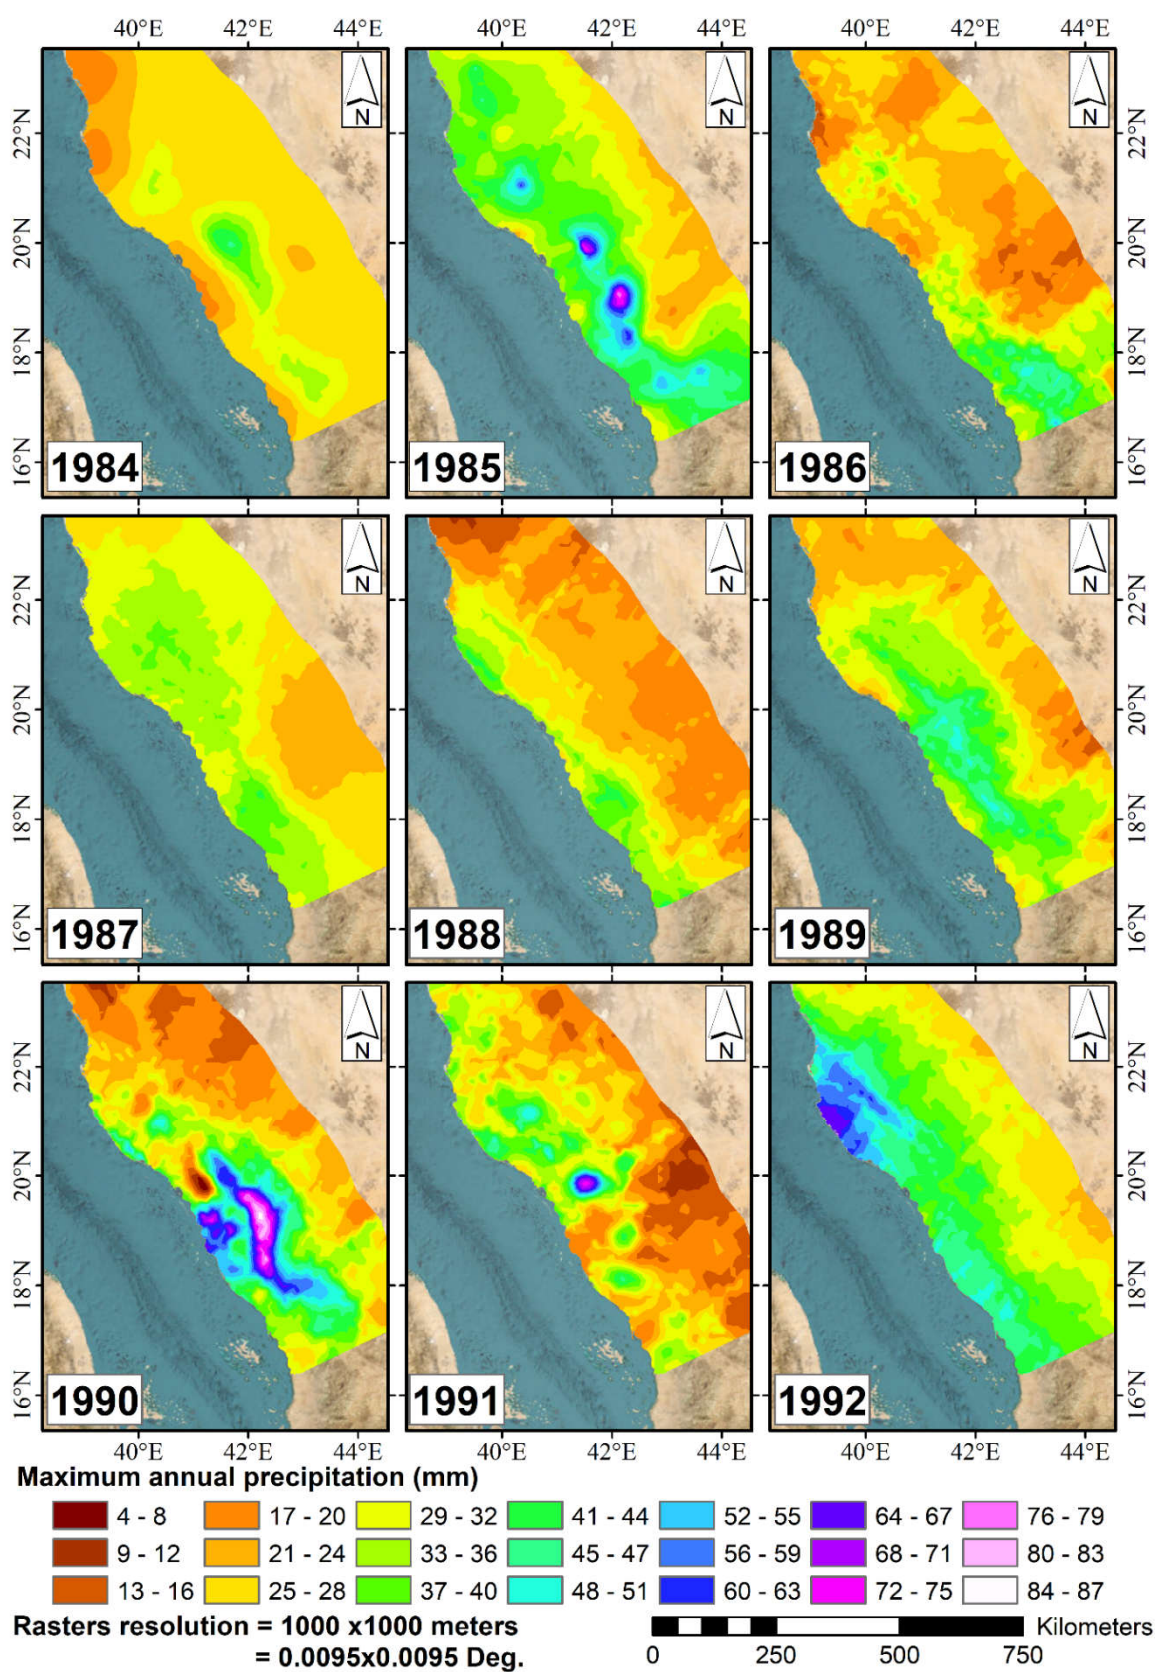

**Figure S3:** Distribution of maximum annual rainfall from 1984 to 1992.

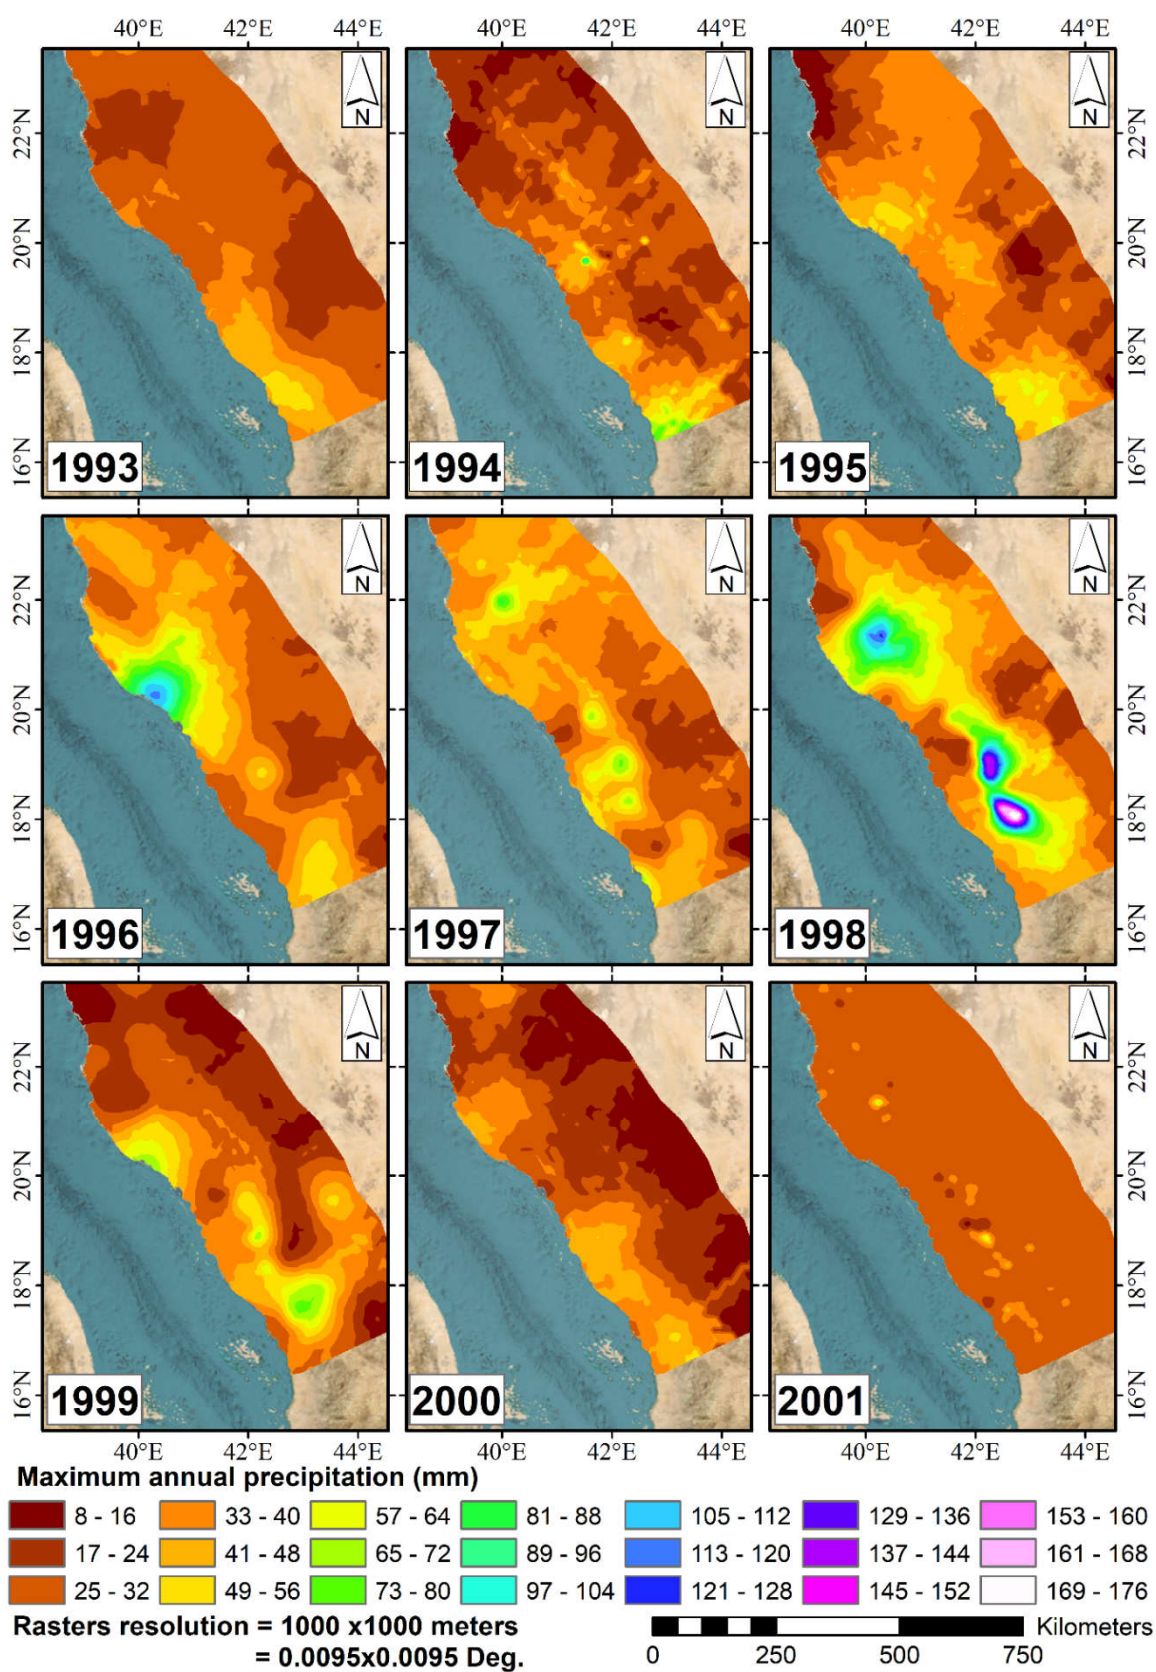

**Figure S4:** Distribution of maximum annual rainfall from 1993 to 2001.



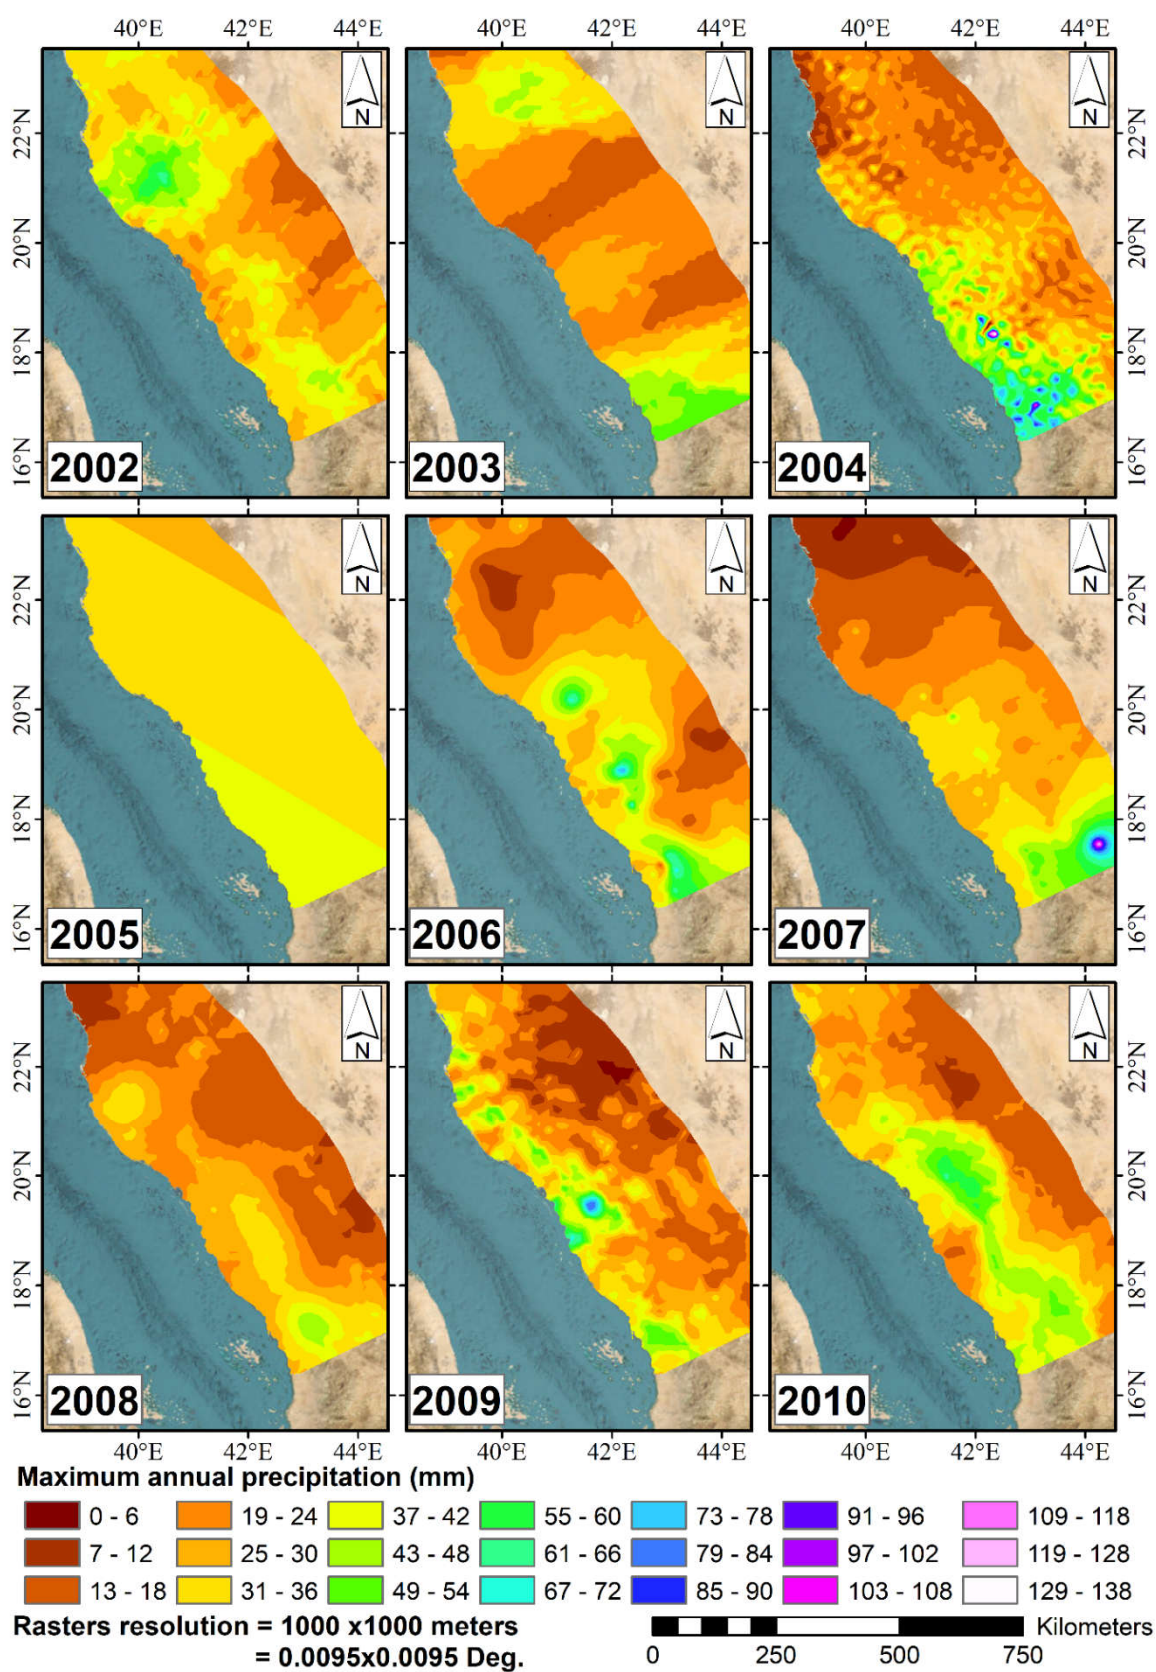

**Figure S5:** Distribution of maximum annual rainfall from 2002 to 2010.

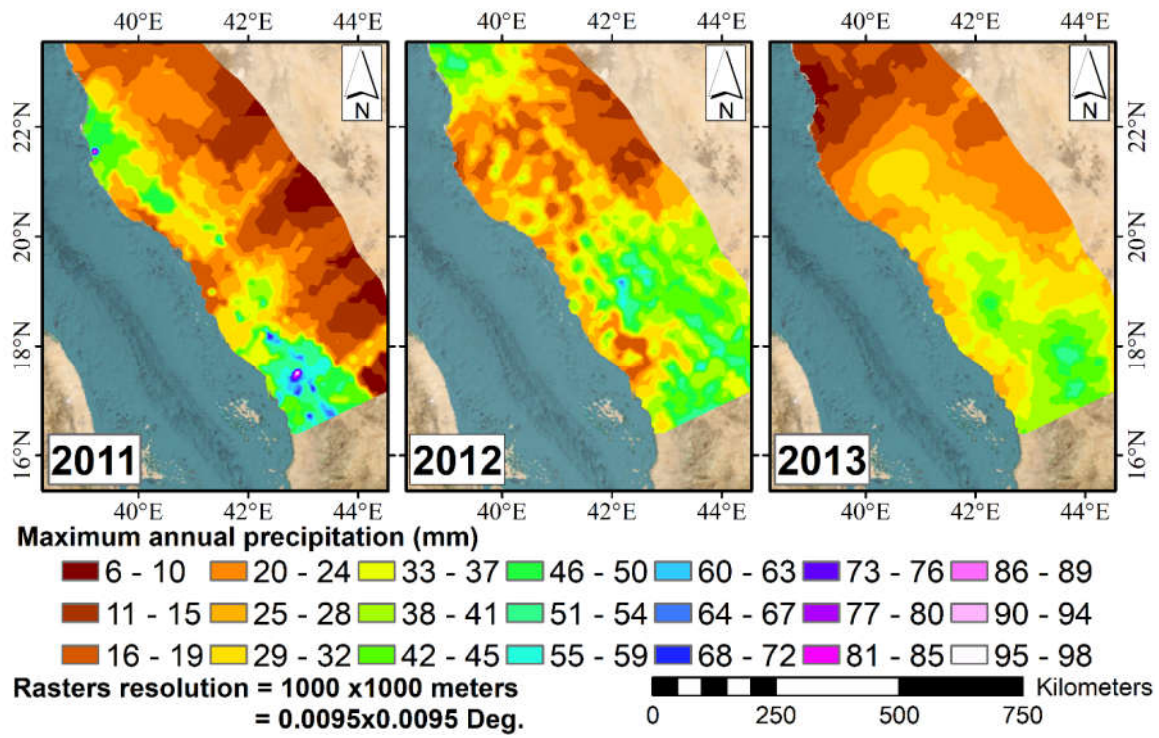

**Figure S6:** Distribution of maximum annual rainfall from 2011 to 2013.



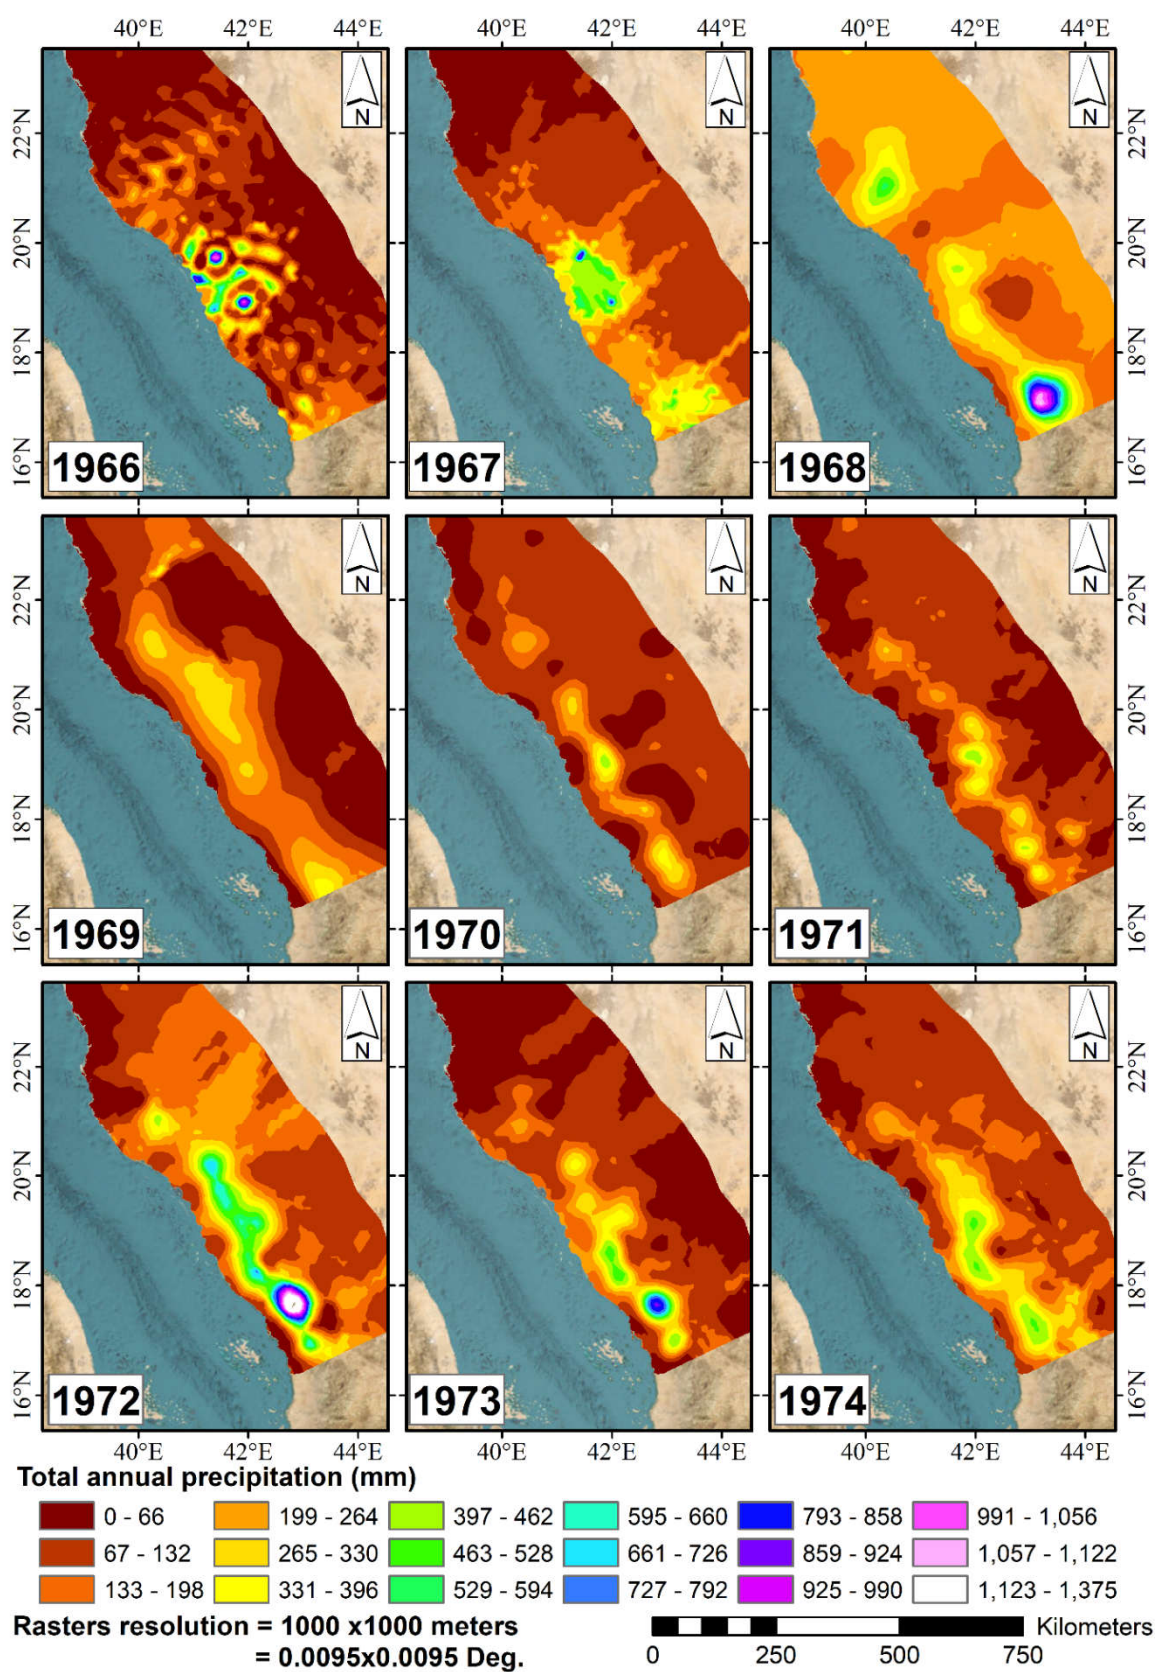

**Figure S7:** Distribution of total annual rainfall from 1966 to 1974.



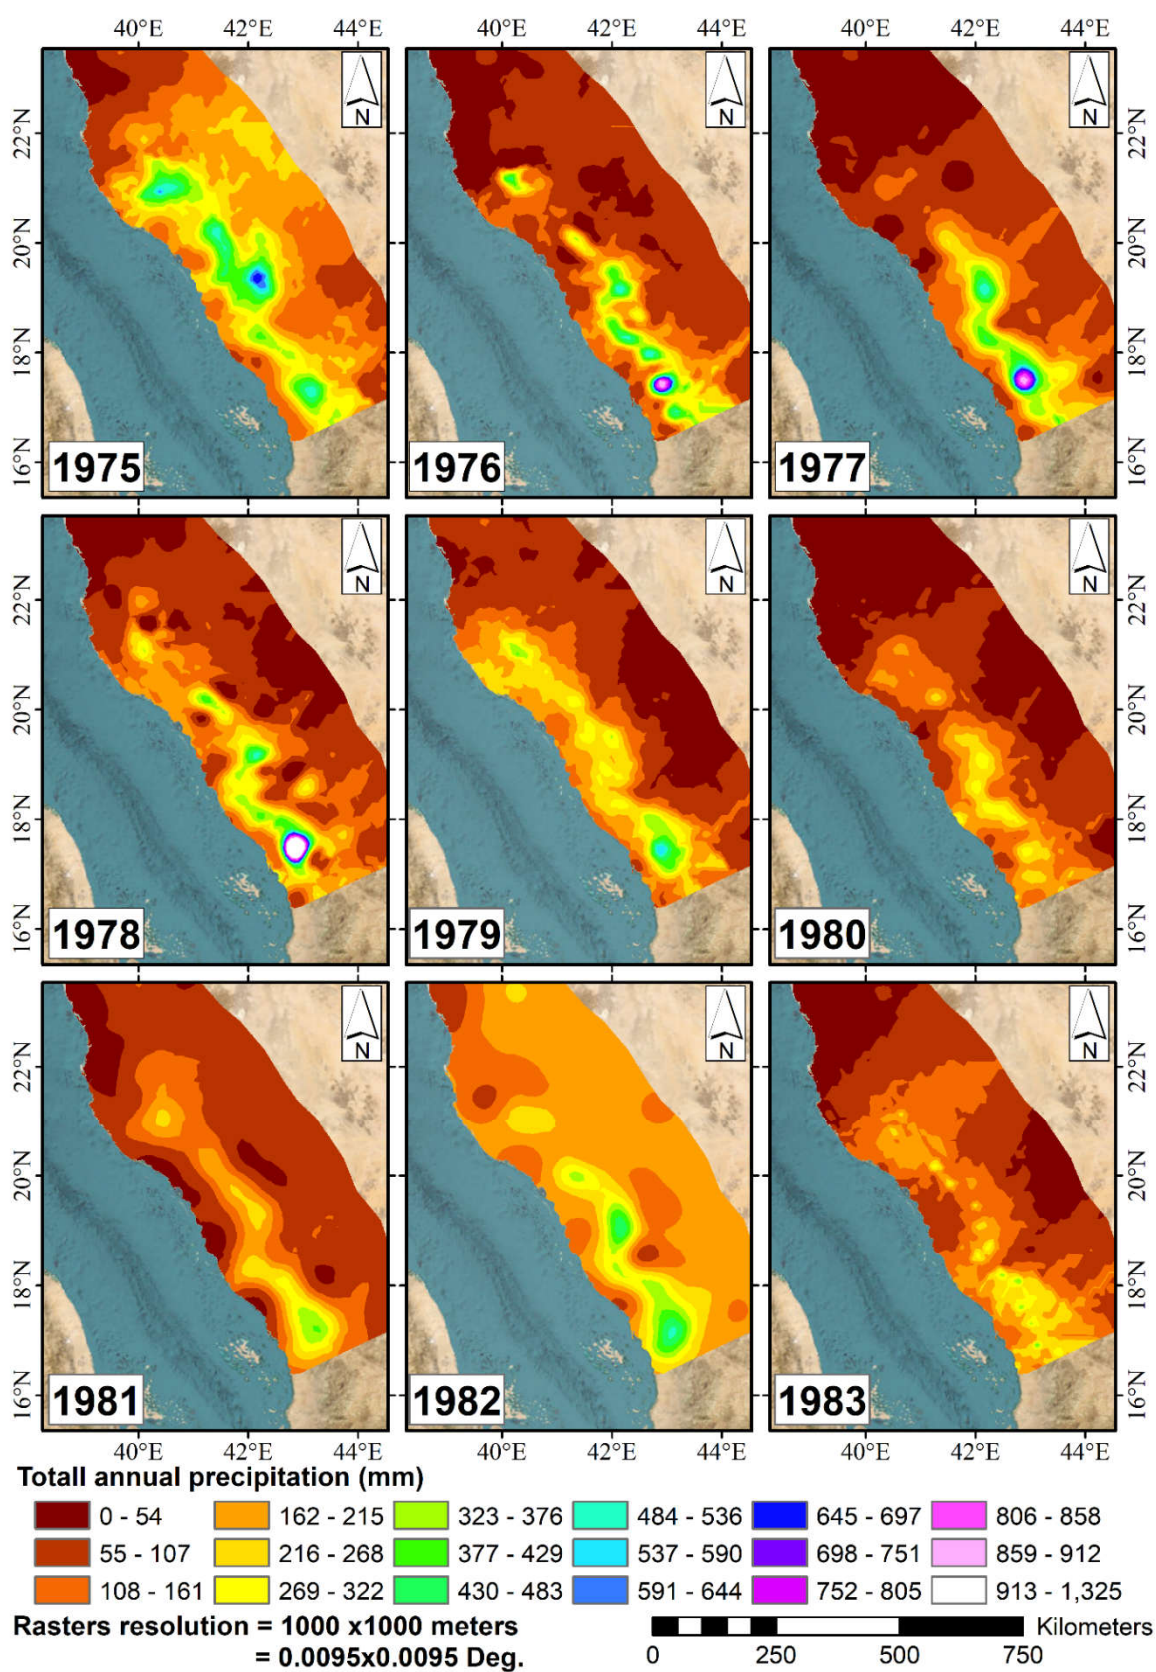

**Figure S8:** Distribution of total annual rainfall from 1965 to 1983.

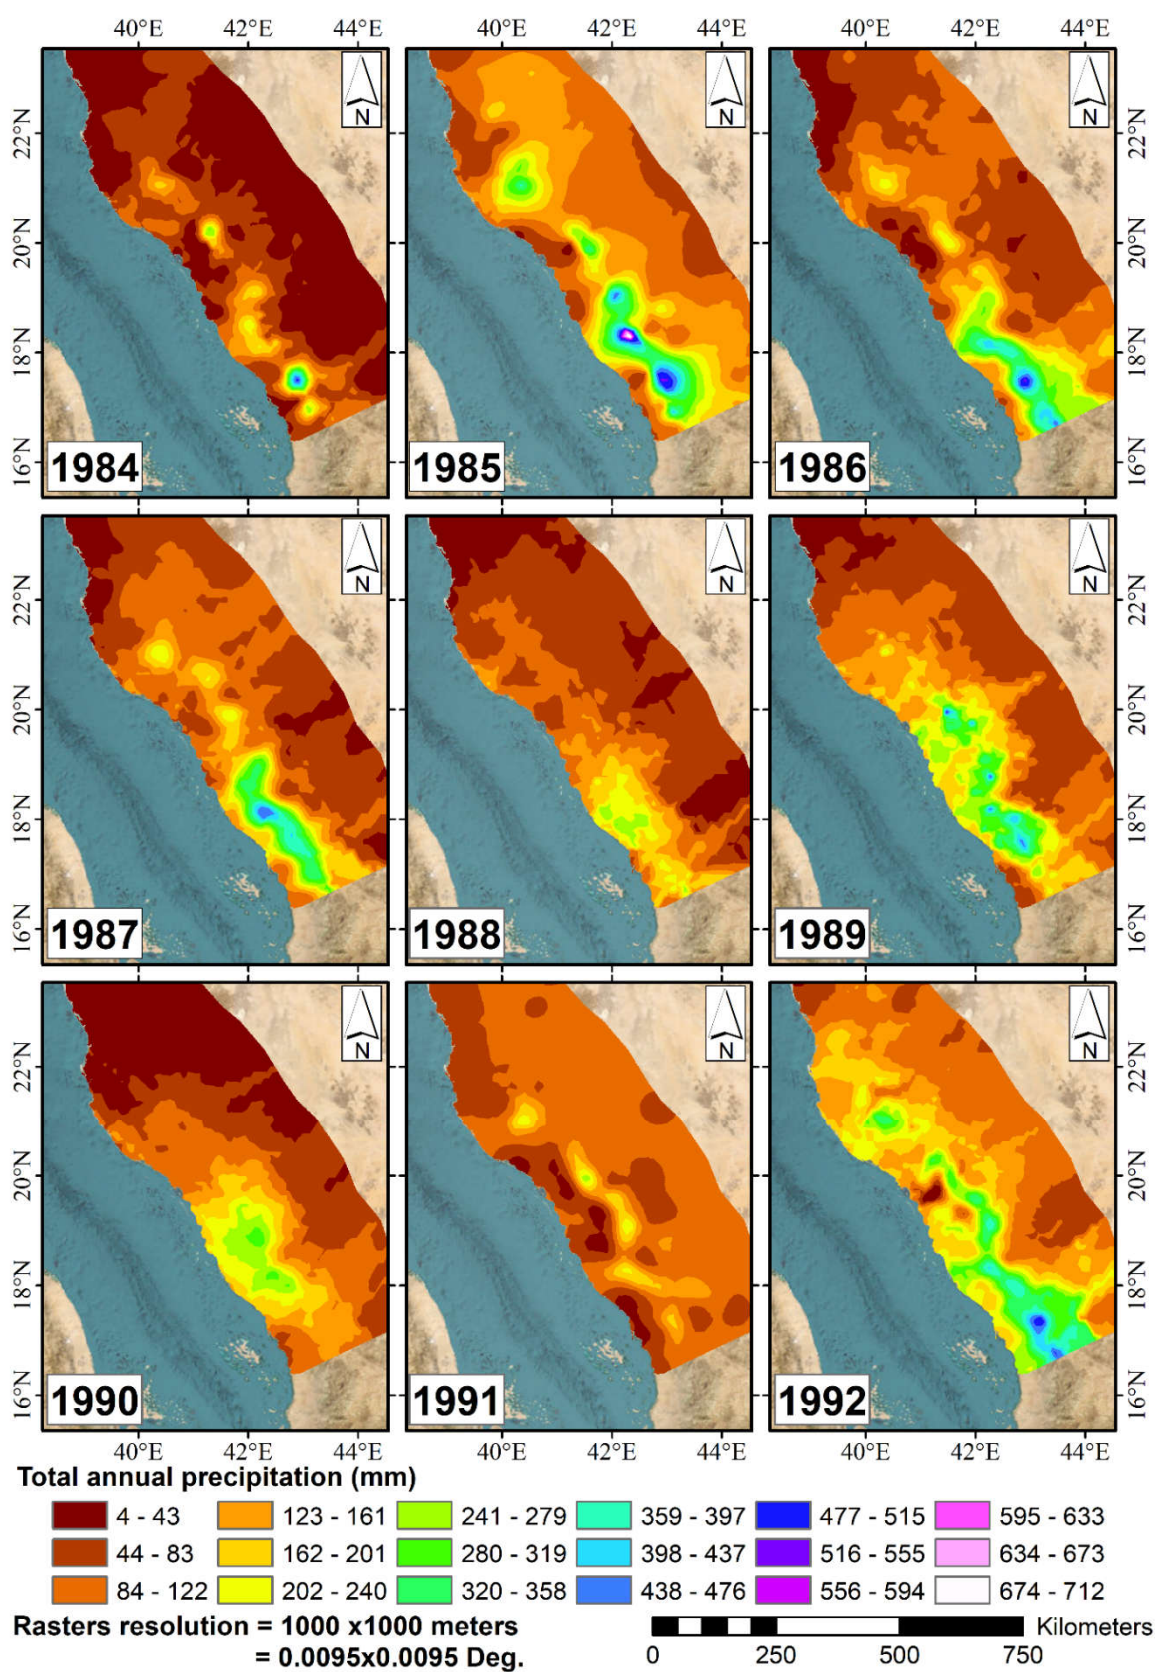

**Figure S9:** Distribution of total annual rainfall from 1984 to 1992.



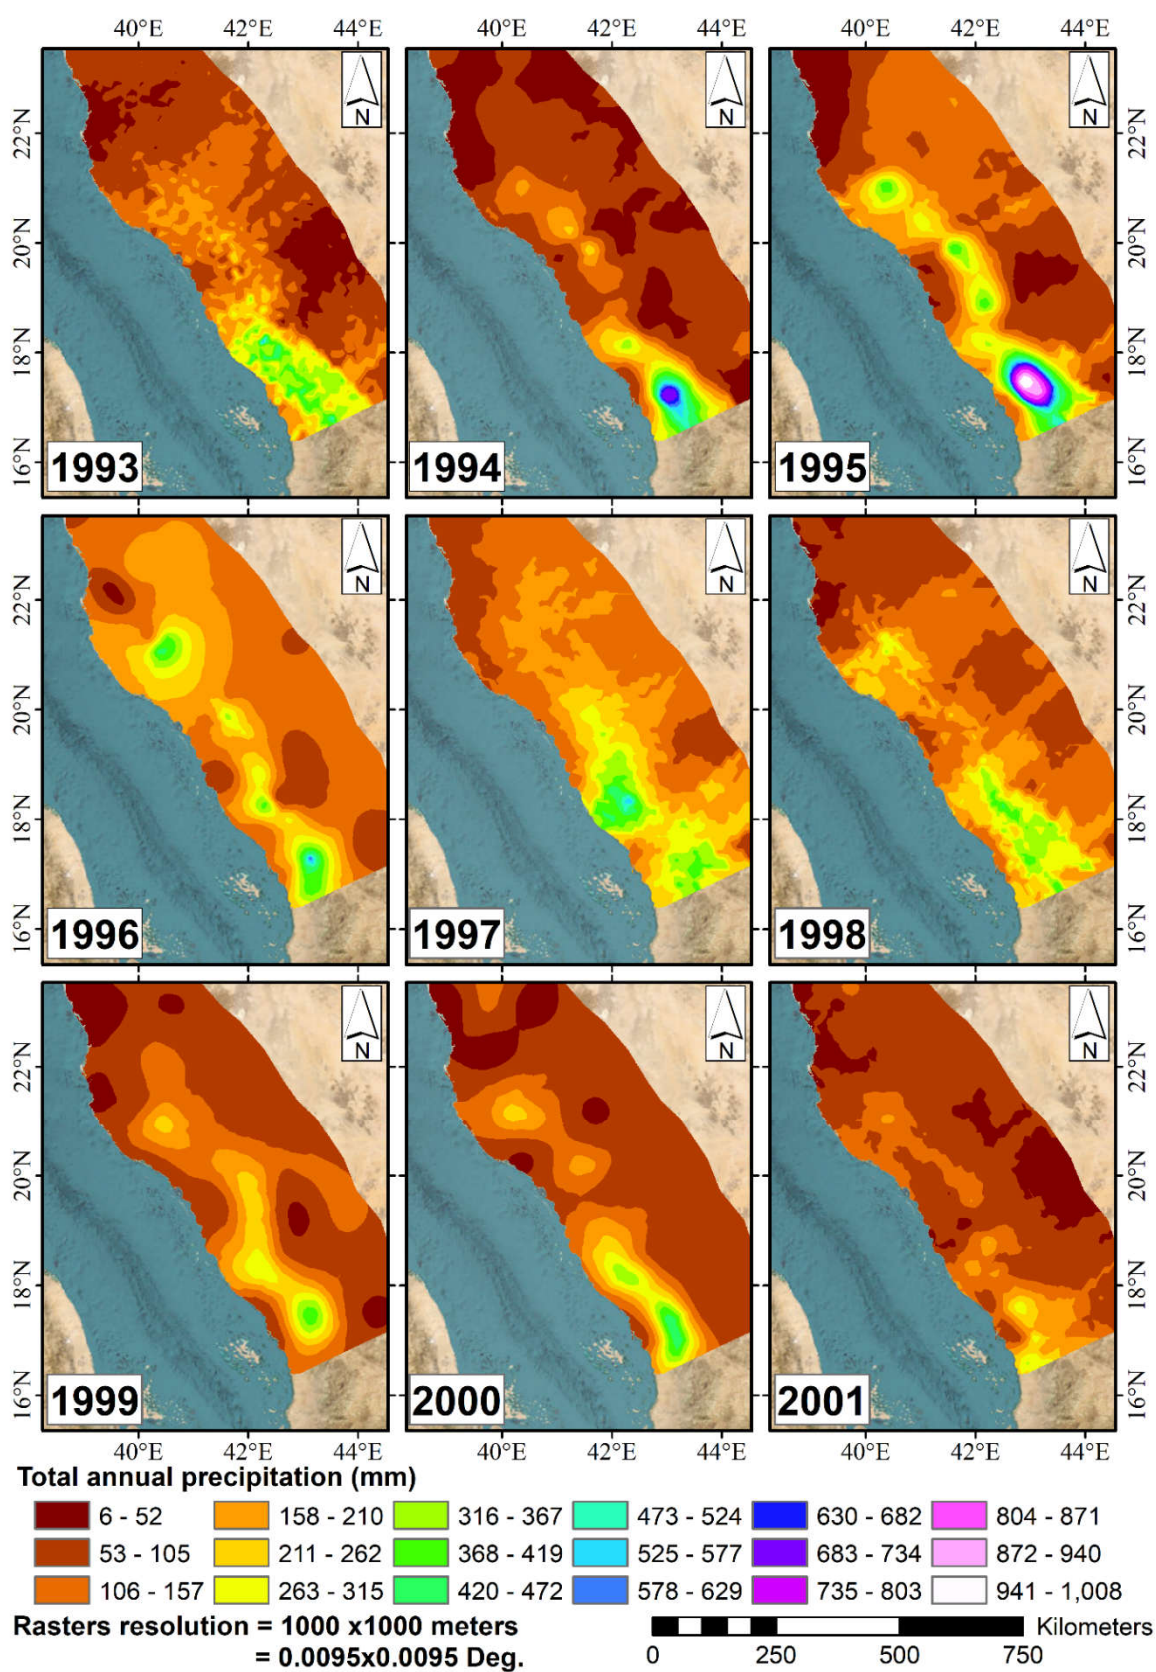

**Figure S10:** Distribution of total annual rainfall from 1993 to 2001.

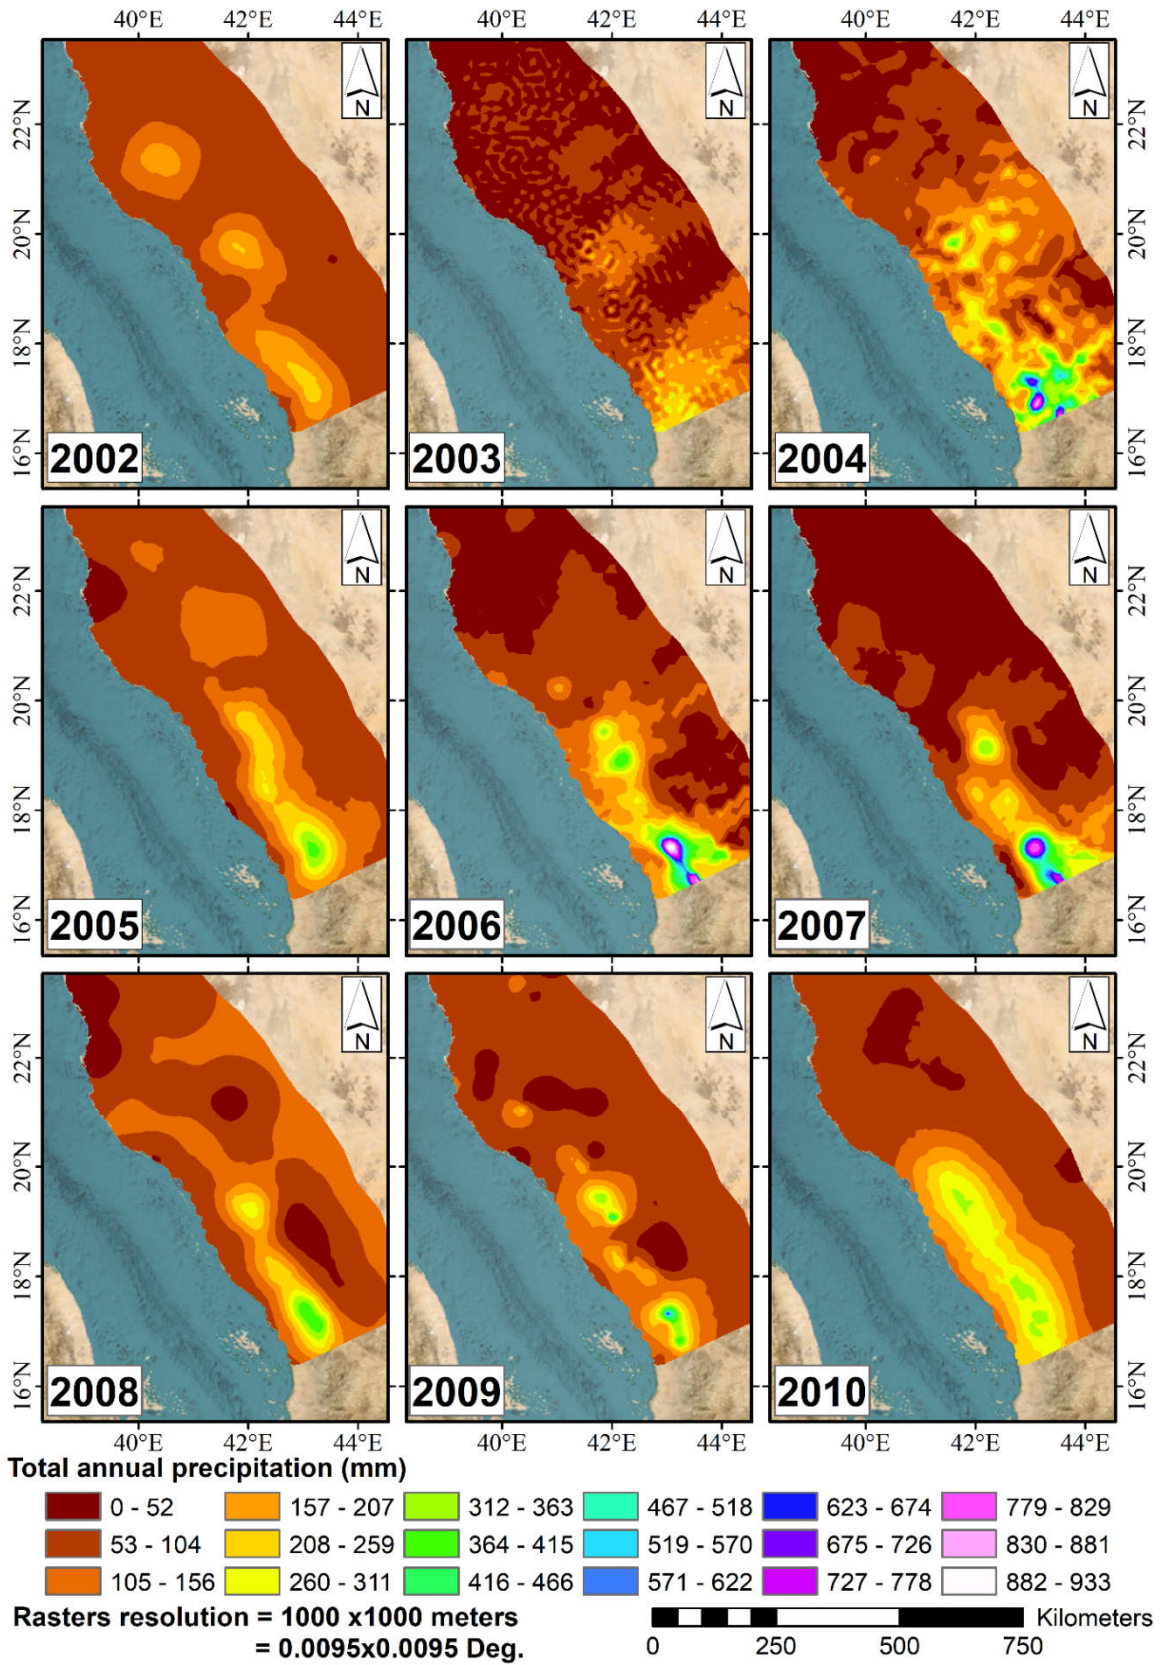

**Figure S11:** Distribution of total annual rainfall from 2002 to 2010.



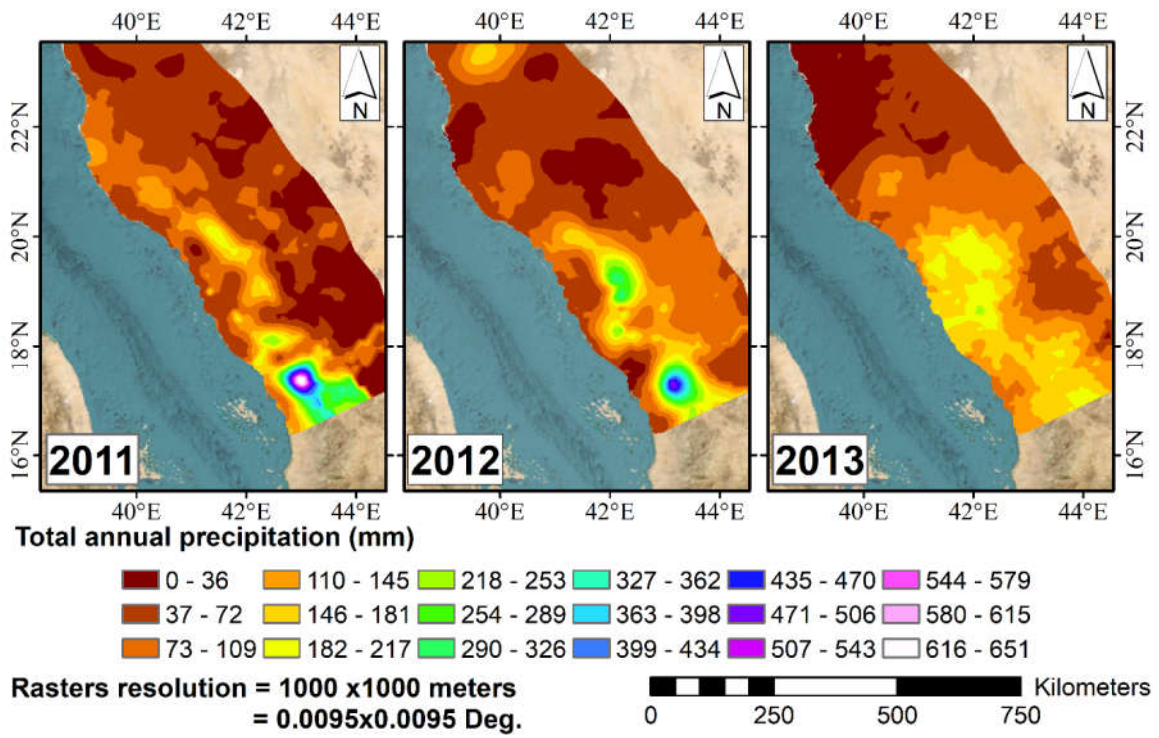

**Figure S12:** Distribution of total annual rainfall from 2011 to 2013.

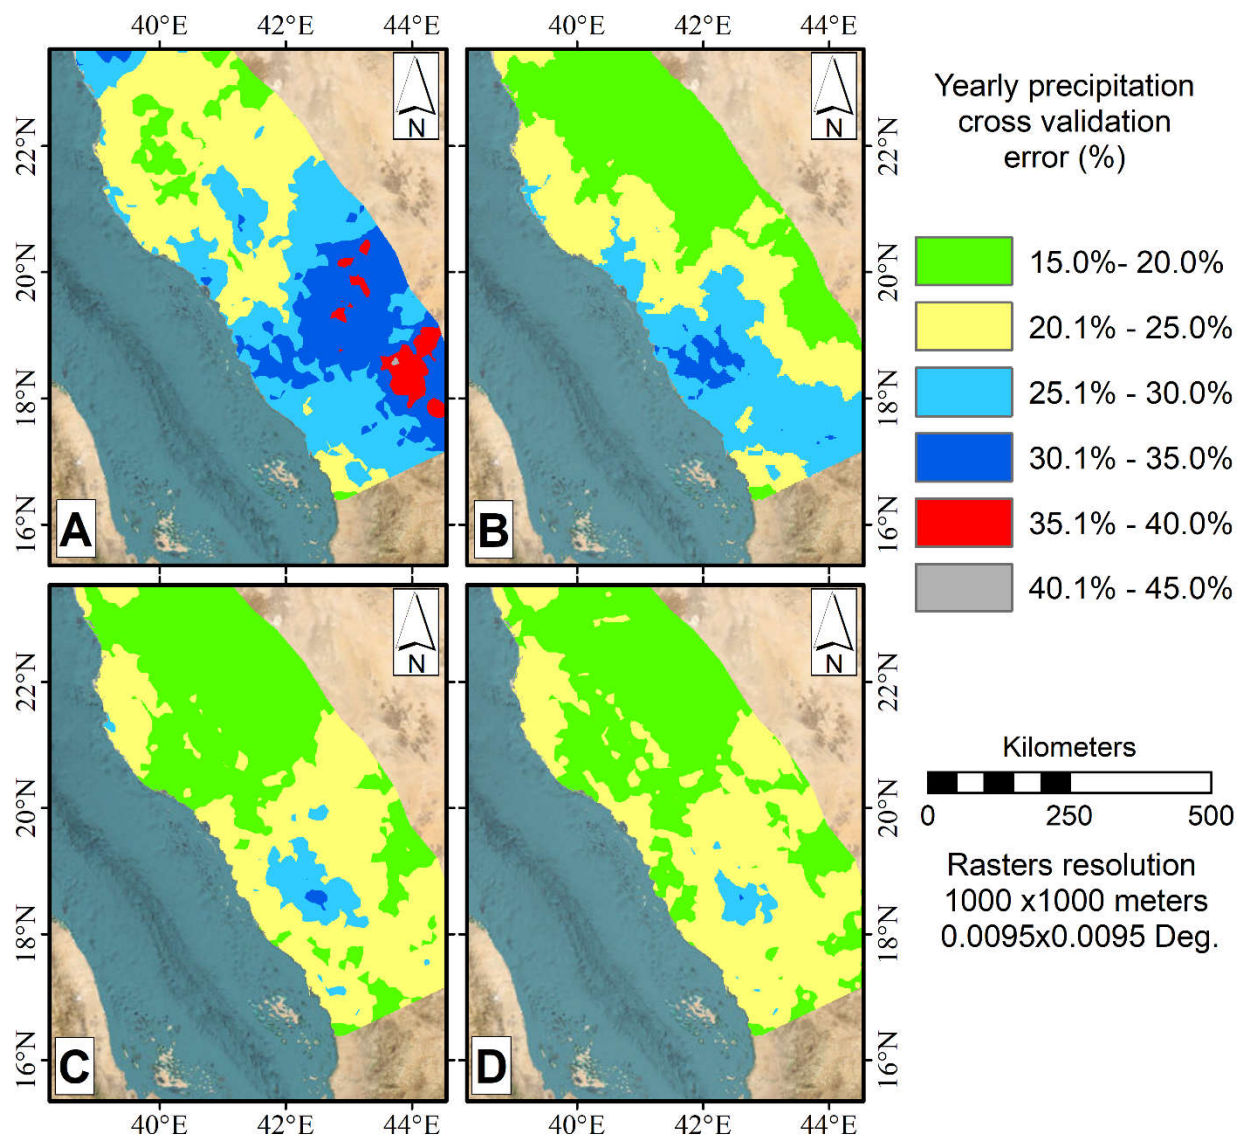

**Figure S13:** Total yearly rainfall cross validation error for A) existing rainfall stations, B) with additional proposed stations (I), C) with additional proposed stations (I) and (II), and D) with additional proposed stations (I), (II), and (III).



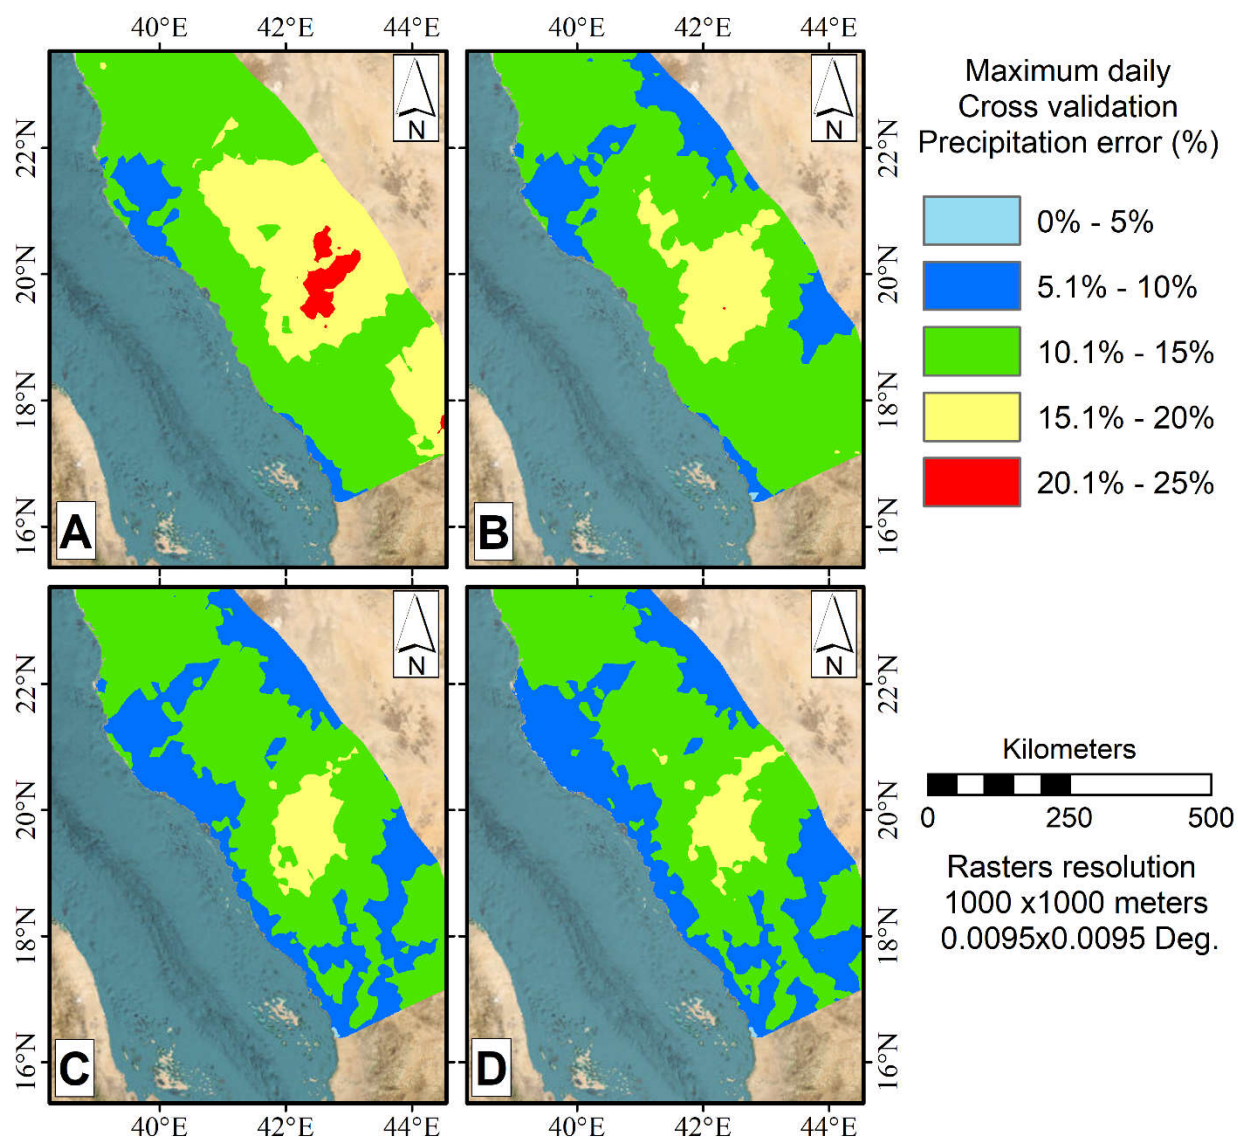

**Figure S14:** Maximum daily rainfall cross-validation error for A) existing rainfall stations, B) with additional proposed stations (I), C) with additional proposed stations (I) and (II), and D) with additional proposed stations (I), (II), and (III).
